# Supplementary material
Source: PubMed Central journal article supplement (PMC4772603)
Supplement: JB.00741-15_zjb999093964so1.pdf [file JB.00741-15_zjb999093964so1.pdf]

TABLE S1 Strains and plasmids used in this study

| Strain or plasmid                 | Relevant properties                                                                                                                                                                                                                                        | Source     |
|-----------------------------------|------------------------------------------------------------------------------------------------------------------------------------------------------------------------------------------------------------------------------------------------------------|------------|
| <b><i>E. coli</i> strains</b>     |                                                                                                                                                                                                                                                            |            |
| DH5- $\alpha$                     | F' <i>endA1 hsdR17 supE44 thi-1 recA1 gyrA96 relA1</i><br>$\Delta(\argF-lacZYA)$ U169( $\Phi$ 80 <i>lacDM15</i> )                                                                                                                                          | Promega    |
| CC118 ( $\lambda$ <i>pir</i> )    | $\Delta(\ara-leu)$ <i>araD</i> $\Delta lacX74$ <i>galE galK phoA20 thi-1 rpsE</i><br><i>rpoB argE(Am) recA1</i> $\lambda$ <i>pir</i>                                                                                                                       | (1)        |
| S17-1 ( $\lambda$ <i>pir</i> )    | Tp <sup>f</sup> Sm <sup>r</sup> <i>recA, thi, pro, r<sub>K</sub><sup>-</sup> m<sub>K</sub><sup>+</sup> RP4:2-Tc:MuK<sub>m</sub> Tn7</i> $\lambda$ <i>pir</i>                                                                                               | (2)        |
| MC4100                            | [ <i>araD139</i> ]B/r $\Delta(\argF-lac)169$ , $\lambda$ -, <i>e14-</i> , <i>flhD5301</i> , $\Delta(\textit{fruK-yeiR})725(\textit{fruA25})$ , <i>relA1</i> , <i>rpsL150(strR)</i> , <i>rbsR22</i> , $\Delta(\textit{fimB-fimE})632(::IS1)$ , <i>deoC1</i> | (3)        |
| <b><i>V. cholerae</i> strains</b> |                                                                                                                                                                                                                                                            |            |
| FY_Vc_1                           | <i>Vibrio cholerae</i> O1 El Tor A1552, smooth variant, Rif <sup>r</sup>                                                                                                                                                                                   | (4)        |
| FY_Vc_3                           | Fy_Vc_1, $\Delta lacZ$ , Rif <sup>r</sup>                                                                                                                                                                                                                  |            |
| FY_Vc_4507                        | Fy_Vc_1, $\Delta lonA$ , Rif <sup>r</sup>                                                                                                                                                                                                                  | This study |
| FY_Vc_9789                        | FY_Vc_4507, $\Delta lonA$ Tn7:: <i>lon</i> , Rif <sup>r</sup>                                                                                                                                                                                              | This study |
| FY_Vc_9569                        | Fy_Vc_1, $\Delta hcp-1$ , $\Delta hcp-2$                                                                                                                                                                                                                   | (3)        |
| FY_Vc_9735                        | Fy_Vc_9569, Tn7:: <i>hcp-1</i>                                                                                                                                                                                                                             | (3)        |
| FY_Vc_9737                        | Fy_Vc_9569, Tn7:: <i>hcp-2</i>                                                                                                                                                                                                                             | (3)        |
| FY_Vc_5869                        | FY_Vc_1, pBBRlux, Rif <sup>r</sup> , Cm <sup>r</sup>                                                                                                                                                                                                       | This study |
| FY_Vc_10006                       | FY_Vc_4507, pBBRlux, Rif <sup>r</sup> , Cm <sup>r</sup>                                                                                                                                                                                                    | This study |
| FY_Vc_5871                        | FY_Vc_1, pFY_950, Rif <sup>r</sup> , Cm <sup>r</sup>                                                                                                                                                                                                       | This study |
| FY_Vc_10007                       | FY_Vc_4507, pFY_950, Rif <sup>r</sup> , Cm <sup>r</sup>                                                                                                                                                                                                    | This study |
| FY_Vc_7128                        | FY_Vc_1, pFY_989, Rif <sup>r</sup> , Cm <sup>r</sup>                                                                                                                                                                                                       | This study |
| FY_Vc_10008                       | FY_Vc_4507, pFY_989, Rif <sup>r</sup> , Cm <sup>r</sup>                                                                                                                                                                                                    | This study |
| FY_Vc_7130                        | FY_Vc_1, pFY_988, Rif <sup>r</sup> , Cm <sup>r</sup>                                                                                                                                                                                                       | This study |
| FY_Vc_10009                       | FY_Vc_4507, pFY_988, Rif <sup>r</sup> , Cm <sup>r</sup>                                                                                                                                                                                                    | This study |
| FY_Vc_7126                        | FY_Vc_1, pFY_1049, Rif <sup>r</sup> , Cm <sup>r</sup>                                                                                                                                                                                                      | This study |

|                       |                                                                                                                      |              |
|-----------------------|----------------------------------------------------------------------------------------------------------------------|--------------|
| FY_Vc_10010           | FY_Vc_4507, pFY_1049, Rif <sup>r</sup> , Cm <sup>r</sup>                                                             | This study   |
| FY_Vc_9988            | FY_Vc_1, pFY_1040, Rif <sup>r</sup> , Cm <sup>r</sup>                                                                | This study   |
| FY_Vc_10011           | FY_Vc_4507, pFY_1040, Rif <sup>r</sup> , Cm <sup>r</sup>                                                             | This study   |
| FY_Vc_9336            | FY_Vc_1, pFY_1038, Rif <sup>r</sup> , Cm <sup>r</sup>                                                                | This study   |
| FY_Vc_10012           | FY_Vc_4507, pFY_1038, Rif <sup>r</sup> , Cm <sup>r</sup>                                                             | This study   |
| FY_Vc_9338            | FY_Vc_1, pFY_951, Rif <sup>r</sup> , Cm <sup>r</sup>                                                                 | This study   |
| FY_Vc_10013           | FY_Vc_4507, pFY_951, Rif <sup>r</sup> , Cm <sup>r</sup>                                                              | This study   |
| <b>Plasmids</b>       |                                                                                                                      |              |
| pBBRlux               | <i>luxCDABE</i> -based promoter fusion vector, Cm <sup>r</sup>                                                       | (5)          |
| pFY_950               | pBBRlux, 498 bp <i>vpsL</i> promoter, Cm <sup>r</sup>                                                                | (6)          |
| pFY_989               | pBBRlux, 317 bp <i>vpsR</i> promoter, Cm <sup>r</sup>                                                                | This study   |
| pFY_988               | pBBRlux, 583 bp <i>vpsT</i> promoter, Cm <sup>r</sup>                                                                | This study   |
| pFY_1049              | pBBRlux, 258 bp <i>hapR</i> promoter, Cm <sup>r</sup>                                                                | This study   |
| pFY_1040              | pBBRlux, 397 bp <i>hcp2</i> promoter, Cm <sup>r</sup>                                                                | This study   |
| pFY_1038              | pBBRlux, 514 bp <i>ctxA</i> promoter, Cm <sup>r</sup>                                                                | This study   |
| pFY_951               | pBBRlux, 527 bp <i>tcpA</i> promoter, Cm <sup>r</sup>                                                                | This study   |
| pGP704- <i>sacB28</i> | pGP704 derivative; <i>mobI oriT sacB</i> , Ap <sup>r</sup>                                                           | G. Schoolnik |
| pFY_596               | pGP704- <i>sac28::Δlon</i> , Ap <sup>r</sup>                                                                         | This study   |
| pFY_720               | pGP704::mTn7, Ap <sup>r</sup> Gm <sup>r</sup>                                                                        | (7)          |
| pFY_3488              | pGP704::mTn7- <i>lon</i> , Ap <sup>r</sup> Gm <sup>r</sup>                                                           | This study   |
| pUX-BF13              | oriR6K helper plasmid, <i>mobI oriT</i> , provides the Tn7 transposition function <i>in trans</i> , Amp <sup>r</sup> | (7)          |

1. **Herrero M, de Lorenzo V, Timmis KN.** 1990. Transposon vectors containing non-antibiotic resistance selection markers for cloning and stable chromosomal insertion of foreign genes in gram-negative bacteria. *Journal of Bacteriology* **172**:6557–6567.
2. **Simon R, Priefer U, Pühler A.** 1983. A broad host range mobilization system for in vivo genetic engineering: transposon mutagenesis in gram negative bacteria.

Nature Biotechnology **1**:784–791.

3. **Cheng AT, Ottemann KM, Yildiz FH.** 2015. *Vibrio cholerae* Response Regulator VxB Controls Colonization and Regulates the Type VI Secretion System. *PLoS Pathog* **11**:e1004933–21.
4. **Yildiz FH, Dolganov NA, Schoolnik GK.** 2001. VpsR, a Member of the Response Regulators of the Two-Component Regulatory Systems, Is Required for Expression of vps Biosynthesis Genes and EPSETr-Associated Phenotypes in *Vibrio cholerae* O1 El Tor. *Journal of Bacteriology* **183**:1716–1726.
5. **Hammer BK, Bassler BL.** 2007. Regulatory small RNAs circumvent the conventional quorum sensing pathway in pandemic *Vibrio cholerae*. *Proc Natl Acad Sci USA* **104**:11145–11149.
6. **Shikuma NJ, Fong JCN, Yildiz FH.** 2012. Cellular levels and binding of c-di-GMP control subcellular localization and activity of the *Vibrio cholerae* transcriptional regulator VpsT. *PLoS Pathog* **8**:e1002719.
7. **Lim B, Beyhan S, Meir J, Yildiz FH.** 2006. Cyclic-diGMP signal transduction systems in *Vibrio cholerae*: modulation of rugosity and biofilm formation. *Molecular Microbiology* **60**:331–348.
